# Supplementary material
Source: publisher figshare collection journal article supplement (https://acs.figshare.com/ndownloader/files/5035387)
Supplement: Supplementary file 1 [file 5035387]

# From Nanomotors to Micromotors: The Influence of the Size of an Autonomous Bubble-Propelled Device upon Its Motion

*Hong Wang, James Guo Sheng Moo and Martin Pumera\**

Division of Chemistry & Biological Chemistry, School of Physical and Mathematical Sciences, Nanyang Technological University, Singapore 637371, Singapore.

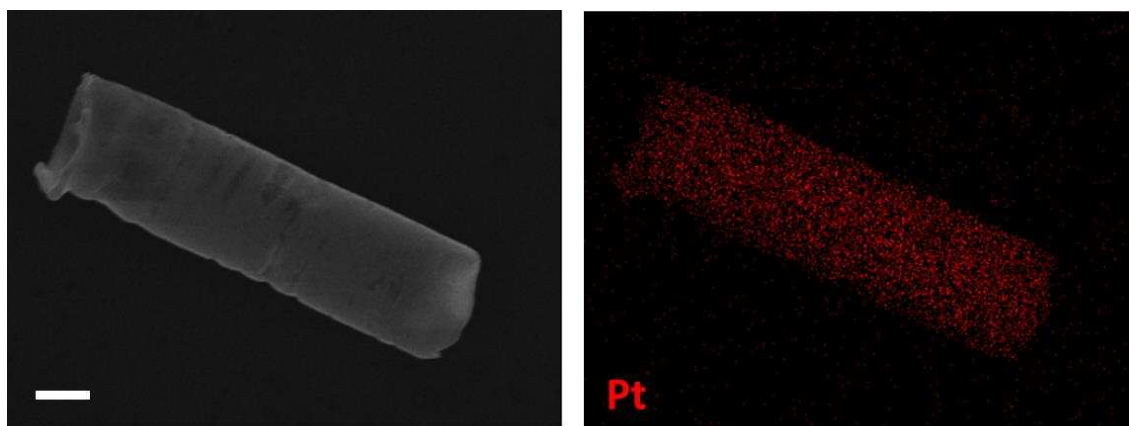

Figure S1. SEM and EDX images of Type A microtubes electrodeposited at -20 mA for 2000s in 5  $\mu\text{m}$  pores. Scale bar is 2  $\mu\text{m}$ .

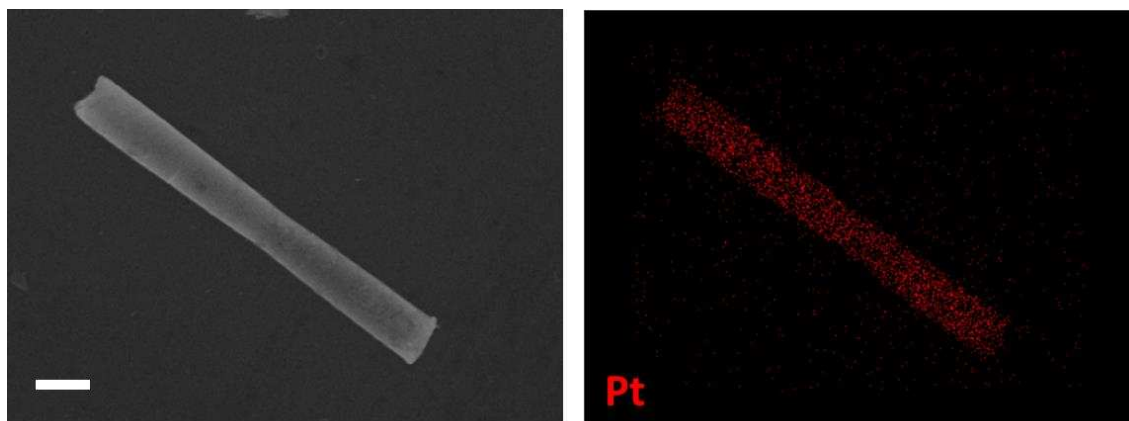

Figure S2. SEM and EDX images of Type B microtubes electrodeposited at -20 mA for 2000s in 2  $\mu\text{m}$  pores. Scale bar is 2  $\mu\text{m}$ .

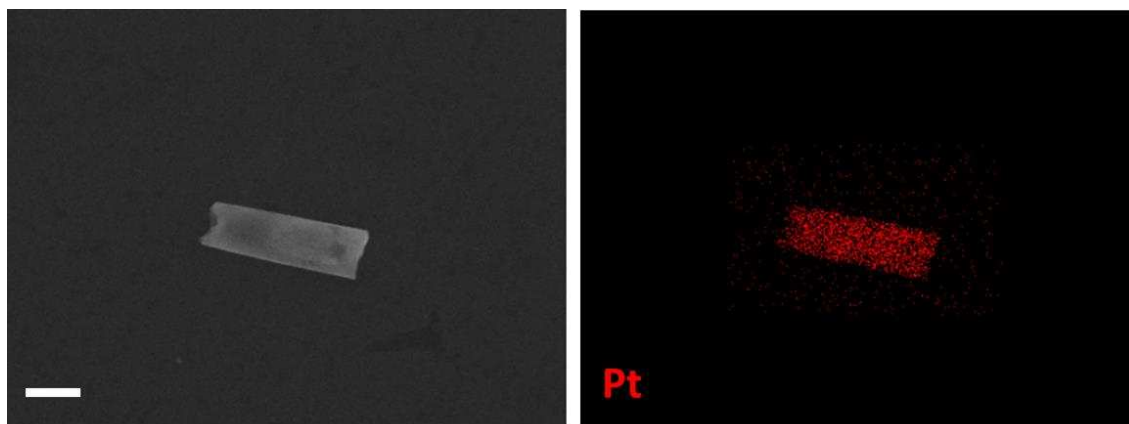

Figure S3. SEM and EDX images of Type C microtubes electrodeposited at -20 mA for 600s in 2  $\mu\text{m}$  pores. Scale bar is 2  $\mu\text{m}$ .

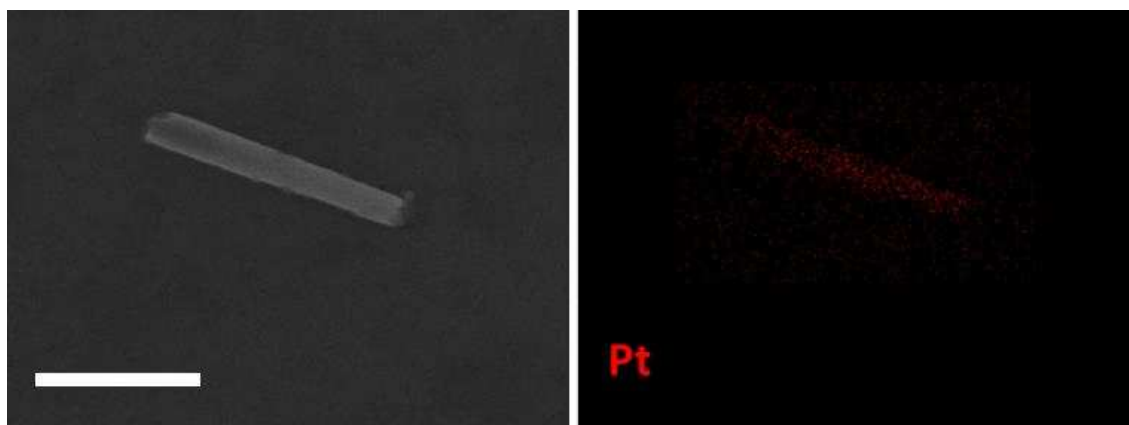

Figure S4. SEM and EDX images of Type D nanotubes electrodeposited at -2 mA for 1000s in 200 nm pores. Scale bar is 1  $\mu\text{m}$ .
